# Supplementary material for: Characteristics of trace metals in traffic-derived particles in Hsuehshan Tunnel, Taiwan: size distribution, potential source, and fingerprinting metal ratio
Source: Copernicus journal article supplement (doi:10.5194/acp-15-4117-2015), 2015-04-21
Supplement: Supplementary file 1 [file acp-15-4117-2015-supplement.pdf]

Supplement of Atmos. Chem. Phys., 15, 4117–4130, 2015  
<http://www.atmos-chem-phys.net/15/4117/2015/>  
doi:10.5194/acp-15-4117-2015-supplement  
© Author(s) 2015. CC Attribution 3.0 License.

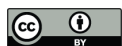

Atmospheric  
Chemistry  
and Physics  
Open Access

The logo for the journal Atmospheric Chemistry and Physics, featuring the letters 'EG' inside a circle with a crosshair.

*Supplement of*

## **Characteristics of trace metals in traffic-derived particles in Hsuehshan Tunnel, Taiwan: size distribution, potential source, and fingerprinting metal ratio**

**Y.-C. Lin et al.**

*Correspondence to:* Y.-C. Lin (yclin26@rcec.sinica.edu.tw)

This Supporting Information material contains three tables and three figures. Table S1 reveals potential sources of airborne PM metals in different sized PM reported by previous studies. Table S2 lists the recoveries and precisions of each PM metal analyzed by ICP-MS, while Table S3 shows correlation matrix of metals in submicron PM. Three figures contained in Supporting Information include (1) average size distributions of Al, Ca, Mg and K as well as La and Ce collected at both the inlet and outlet sites of Hsuehshan Tunnel (Figure S1), (2) size distributions of traffic-related elements in all sets collected at both the two sites of Hsuehshan Tunnel (Figure S2), and (3) size distributions of some crustal and REEs in all sets collected at both the two sites of Hsuehshan Tunnel (Figure S3).

Table S1 Potential sources of airborne particulate metals in different particle sizes reported in the literatures.

| Metals                                              | Particle Size | Potential Source                                                                  | Reference <sup>a</sup> |
|-----------------------------------------------------|---------------|-----------------------------------------------------------------------------------|------------------------|
| Si, Fe, Ca, Na, Mg, Al and K                        | Coarse        | Road dust                                                                         | 1,2,3                  |
| Ca and K                                            | Submicron     | Tail pipe emission<br><i>-lubricating oil</i><br><i>-volatile from K-compound</i> | 4,5,6                  |
| Pb, Zn, Ni and V                                    | Submicron     | Pipe emissions<br><i>-gasoline and diesel engines</i>                             | 3,7,8                  |
| Fe, Ba, Mn, Cu, Mo, Cd, Sb,<br>Ti, V, Ga, Zn and Pb | Coarse        | Wear dust<br><i>-brake linings</i><br><i>-tire wear</i>                           | 9,10,11,12             |
| La, Ce, Pr, Nd, Sm                                  | Fine          | Automobile catalyst                                                               | 13,14                  |

<sup>a</sup>1.Zhang et al. (2014); 2.Ho et al. (2003); 3.Lin et al. (2005); 4.Hee and Filip, (2005); 5.Iijima et al. (2007); 6.Kuo et al. (2009); 7.Wang et al. (2003); 8.Shafer et al. (2012); 9.Lough et al. (2005); 10.Grieshop et al. (2006); 11.Thorpe and Harrison (2008); 12. Wåhlin et al. (2006); 13.Huang et al. (1994); 14.Kulkarni et al. (2006).

Table S2

Recoveries and precisions of trace metals analyzed by ICP-MS compared to certified or reference values of SRM 1648.

| Elements <sup>a</sup> | Certified value<br>( $\mu\text{g/g}$ ) | Measured value<br>( $\mu\text{g/g}$ , N=7) | Accuracy<br>(%, N=7) | Precision<br>(%, N=7) | MDLs<br>( $\text{ng/m}^3$ , N=7) |
|-----------------------|----------------------------------------|--------------------------------------------|----------------------|-----------------------|----------------------------------|
| Al                    | 34200                                  | 35345 $\pm$ 894                            | 103                  | 3                     | 2.09                             |
| Fe                    | 39100                                  | 38603 $\pm$ 534                            | 99                   | 1                     | 2.67                             |
| Na                    | 4250                                   | 4353 $\pm$ 457                             | 102                  | 1                     | 7.19                             |
| Mg <sup>*</sup>       | 8000                                   | 8377 $\pm$ 474                             | 105                  | 6                     | 0.57                             |
| K                     | 10500                                  | 9982 $\pm$ 119                             | 95                   | 1                     | 3.36                             |
| Ba <sup>*</sup>       | 737                                    | 734 $\pm$ 26                               | 100                  | 4                     | 0.03                             |
| Ti <sup>*</sup>       | 4000                                   | 3962 $\pm$ 113                             | 99                   | 3                     | 0.04                             |
| Mn                    | 786                                    | 787 $\pm$ 37                               | 100                  | 5                     | 0.08                             |
| Co <sup>*</sup>       | 18                                     | 18 $\pm$ 0.4                               | 98                   | 2                     | 0.003                            |
| Ni                    | 82                                     | 82 $\pm$ 2                                 | 100                  | 3                     | 0.07                             |
| Cu                    | 609                                    | 577 $\pm$ 11                               | 95                   | 2                     | 0.18                             |
| Zn                    | 4760                                   | 4411 $\pm$ 114                             | 93                   | 3                     | 0.31                             |
| Cd                    | 75                                     | 73 $\pm$ 3                                 | 98                   | 4                     | 0.009                            |
| Sb <sup>*</sup>       | 45                                     | 49 $\pm$ 0.5                               | 109                  | 1                     | 0.08                             |
| Pb                    | 6550                                   | 6621 $\pm$ 293                             | 101                  | 4                     | 0.05                             |
| V                     | 127                                    | 126 $\pm$ 2                                | 99                   | 2                     | 0.03                             |
| Cr                    | 403                                    | 389 $\pm$ 5                                | 96                   | 1                     | 0.22                             |
| As                    | 115                                    | 126 $\pm$ 2                                | 110                  | 1                     | 0.07                             |
| Se                    | 27                                     | 27 $\pm$ 1.4                               | 100                  | 5                     | 0.05                             |
| Cs <sup>*</sup>       | 3                                      | 3 $\pm$ 0.1                                | 105                  | 3                     | 0.01                             |
| Ce <sup>*</sup>       | 55                                     | 54 $\pm$ 2.6                               | 98                   | 5                     | 0.006                            |
| U                     | 5.5                                    | 5.5 $\pm$ 0.3                              | 100                  | 6                     | 0.00004                          |

<sup>a</sup>. \* Reference value reported by NIST.

Table S3

Correlation matrix of selected elements in submicron particles observed in Hsuehshan Tunnel. Correlation coefficient higher than 0.8 is marked in bold.

|    | Al    | Fe          | Mg          | K    | Ca          | Sr    | Ba          | Ti    | Mn          | Ni    | Cu          | Zn          | Mo          | Cd          | Sn          | Sb          | Pb          | V     | Cr    | Rb   | Cs   | Ga          | La          | Ce          | Pr   | Nd   |
|----|-------|-------------|-------------|------|-------------|-------|-------------|-------|-------------|-------|-------------|-------------|-------------|-------------|-------------|-------------|-------------|-------|-------|------|------|-------------|-------------|-------------|------|------|
| Al | 1.00  |             |             |      |             |       |             |       |             |       |             |             |             |             |             |             |             |       |       |      |      |             |             |             |      |      |
| Fe | 0.20  | 1.00        |             |      |             |       |             |       |             |       |             |             |             |             |             |             |             |       |       |      |      |             |             |             |      |      |
| Mg | 0.23  | 0.77        | 1.00        |      |             |       |             |       |             |       |             |             |             |             |             |             |             |       |       |      |      |             |             |             |      |      |
| K  | 0.17  | 0.69        | 0.59        | 1.00 |             |       |             |       |             |       |             |             |             |             |             |             |             |       |       |      |      |             |             |             |      |      |
| Ca | 0.39  | 0.71        | <b>0.82</b> | 0.39 | 1.00        |       |             |       |             |       |             |             |             |             |             |             |             |       |       |      |      |             |             |             |      |      |
| Sr | 0.41  | 0.54        | 0.58        | 0.31 | 0.75        | 1.00  |             |       |             |       |             |             |             |             |             |             |             |       |       |      |      |             |             |             |      |      |
| Ba | 0.20  | <b>0.91</b> | 0.79        | 0.53 | 0.70        | 0.63  | 1.00        |       |             |       |             |             |             |             |             |             |             |       |       |      |      |             |             |             |      |      |
| Ti | 0.09  | 0.76        | 0.56        | 0.43 | 0.51        | 0.35  | 0.74        | 1.00  |             |       |             |             |             |             |             |             |             |       |       |      |      |             |             |             |      |      |
| Mn | 0.08  | 0.63        | 0.32        | 0.61 | 0.36        | 0.14  | 0.27        | 0.38  | 1.00        |       |             |             |             |             |             |             |             |       |       |      |      |             |             |             |      |      |
| Ni | 0.43  | -0.06       | 0.09        | 0.06 | 0.15        | 0.34  | -0.02       | 0.04  | -0.13       | 1.00  |             |             |             |             |             |             |             |       |       |      |      |             |             |             |      |      |
| Cu | 0.06  | <b>0.90</b> | 0.74        | 0.51 | 0.62        | 0.53  | <b>0.97</b> | 0.78  | 0.29        | -0.07 | 1.00        |             |             |             |             |             |             |       |       |      |      |             |             |             |      |      |
| Zn | -0.02 | 0.58        | 0.26        | 0.58 | 0.27        | 0.08  | 0.23        | 0.41  | <b>0.98</b> | -0.15 | 0.26        | 1.00        |             |             |             |             |             |       |       |      |      |             |             |             |      |      |
| Mo | 0.04  | <b>0.88</b> | 0.73        | 0.51 | 0.66        | 0.63  | <b>0.94</b> | 0.71  | 0.29        | -0.06 | <b>0.96</b> | 0.27        | 1.00        |             |             |             |             |       |       |      |      |             |             |             |      |      |
| Cd | 0.05  | 0.77        | 0.44        | 0.70 | 0.43        | 0.30  | 0.49        | 0.60  | <b>0.91</b> | 0.00  | 0.52        | <b>0.93</b> | 0.51        | 1.00        |             |             |             |       |       |      |      |             |             |             |      |      |
| Sn | 0.06  | <b>0.87</b> | 0.72        | 0.52 | 0.67        | 0.63  | <b>0.94</b> | 0.78  | 0.27        | -0.05 | <b>0.96</b> | 0.24        | <b>0.95</b> | 0.52        | 1.00        |             |             |       |       |      |      |             |             |             |      |      |
| Sb | 0.07  | <b>0.87</b> | 0.69        | 0.57 | 0.55        | 0.51  | <b>0.92</b> | 0.72  | 0.29        | -0.03 | <b>0.94</b> | 0.25        | <b>0.88</b> | 0.53        | <b>0.93</b> | 1.00        |             |       |       |      |      |             |             |             |      |      |
| Pb | 0.23  | 0.68        | 0.44        | 0.68 | 0.50        | 0.30  | 0.38        | 0.40  | <b>0.84</b> | -0.02 | 0.35        | 0.77        | 0.35        | <b>0.82</b> | 0.40        | 0.45        | 1.00        |       |       |      |      |             |             |             |      |      |
| V  | -0.04 | -0.12       | -0.16       | 0.01 | -0.25       | 0.01  | -0.04       | -0.04 | -0.24       | 0.50  | -0.02       | -0.18       | -0.03       | 0.00        | 0.01        | 0.05        | -0.18       | 1.00  |       |      |      |             |             |             |      |      |
| Cr | -0.10 | 0.16        | -0.03       | 0.18 | -0.02       | -0.06 | 0.11        | 0.44  | 0.16        | -0.10 | 0.15        | 0.33        | 0.09        | 0.36        | 0.15        | 0.11        | 0.16        | 0.11  | 1.00  |      |      |             |             |             |      |      |
| Rb | 0.31  | 0.64        | 0.65        | 0.72 | 0.57        | 0.32  | 0.43        | 0.38  | 0.65        | 0.09  | 0.37        | 0.56        | 0.36        | 0.65        | 0.40        | 0.47        | <b>0.89</b> | -0.15 | 0.07  | 1.00 |      |             |             |             |      |      |
| Cs | 0.21  | 0.32        | 0.64        | 0.31 | 0.43        | 0.26  | 0.28        | 0.17  | 0.15        | 0.24  | 0.23        | 0.11        | 0.19        | 0.23        | 0.21        | 0.32        | 0.42        | 0.05  | -0.02 | 0.73 | 1.00 |             |             |             |      |      |
| Ga | 0.13  | <b>0.92</b> | <b>0.82</b> | 0.56 | 0.74        | 0.64  | <b>0.98</b> | 0.75  | 0.33        | -0.01 | <b>0.95</b> | 0.29        | <b>0.92</b> | 0.54        | <b>0.93</b> | <b>0.91</b> | 0.43        | -0.02 | 0.13  | 0.48 | 0.32 | 1.00        |             |             |      |      |
| La | 0.39  | 0.78        | 0.68        | 0.43 | <b>0.80</b> | 0.71  | <b>0.80</b> | 0.56  | 0.30        | 0.06  | 0.74        | 0.22        | 0.79        | 0.41        | 0.76        | 0.67        | 0.45        | -0.10 | 0.02  | 0.46 | 0.23 | <b>0.80</b> | 1.00        |             |      |      |
| Ce | 0.11  | 0.73        | 0.65        | 0.39 | 0.71        | 0.72  | <b>0.86</b> | 0.57  | 0.08        | -0.04 | <b>0.84</b> | 0.02        | <b>0.90</b> | 0.27        | <b>0.89</b> | 0.79        | 0.29        | -0.11 | 0.01  | 0.32 | 0.15 | <b>0.84</b> | <b>0.84</b> | 1.00        |      |      |
| Pr | 0.26  | 0.49        | 0.42        | 0.38 | 0.38        | 0.28  | 0.50        | 0.35  | 0.11        | 0.03  | 0.53        | 0.07        | 0.58        | 0.18        | 0.45        | 0.47        | 0.17        | -0.16 | -0.04 | 0.24 | 0.09 | 0.46        | 0.64        | 0.55        | 1.00 |      |
| Nd | 0.16  | 0.76        | 0.67        | 0.41 | 0.74        | 0.73  | <b>0.88</b> | 0.59  | 0.10        | -0.01 | <b>0.85</b> | 0.04        | <b>0.90</b> | 0.29        | <b>0.89</b> | <b>0.80</b> | 0.31        | -0.11 | 0.01  | 0.34 | 0.16 | <b>0.86</b> | <b>0.87</b> | <b>1.00</b> | 0.57 | 1.00 |

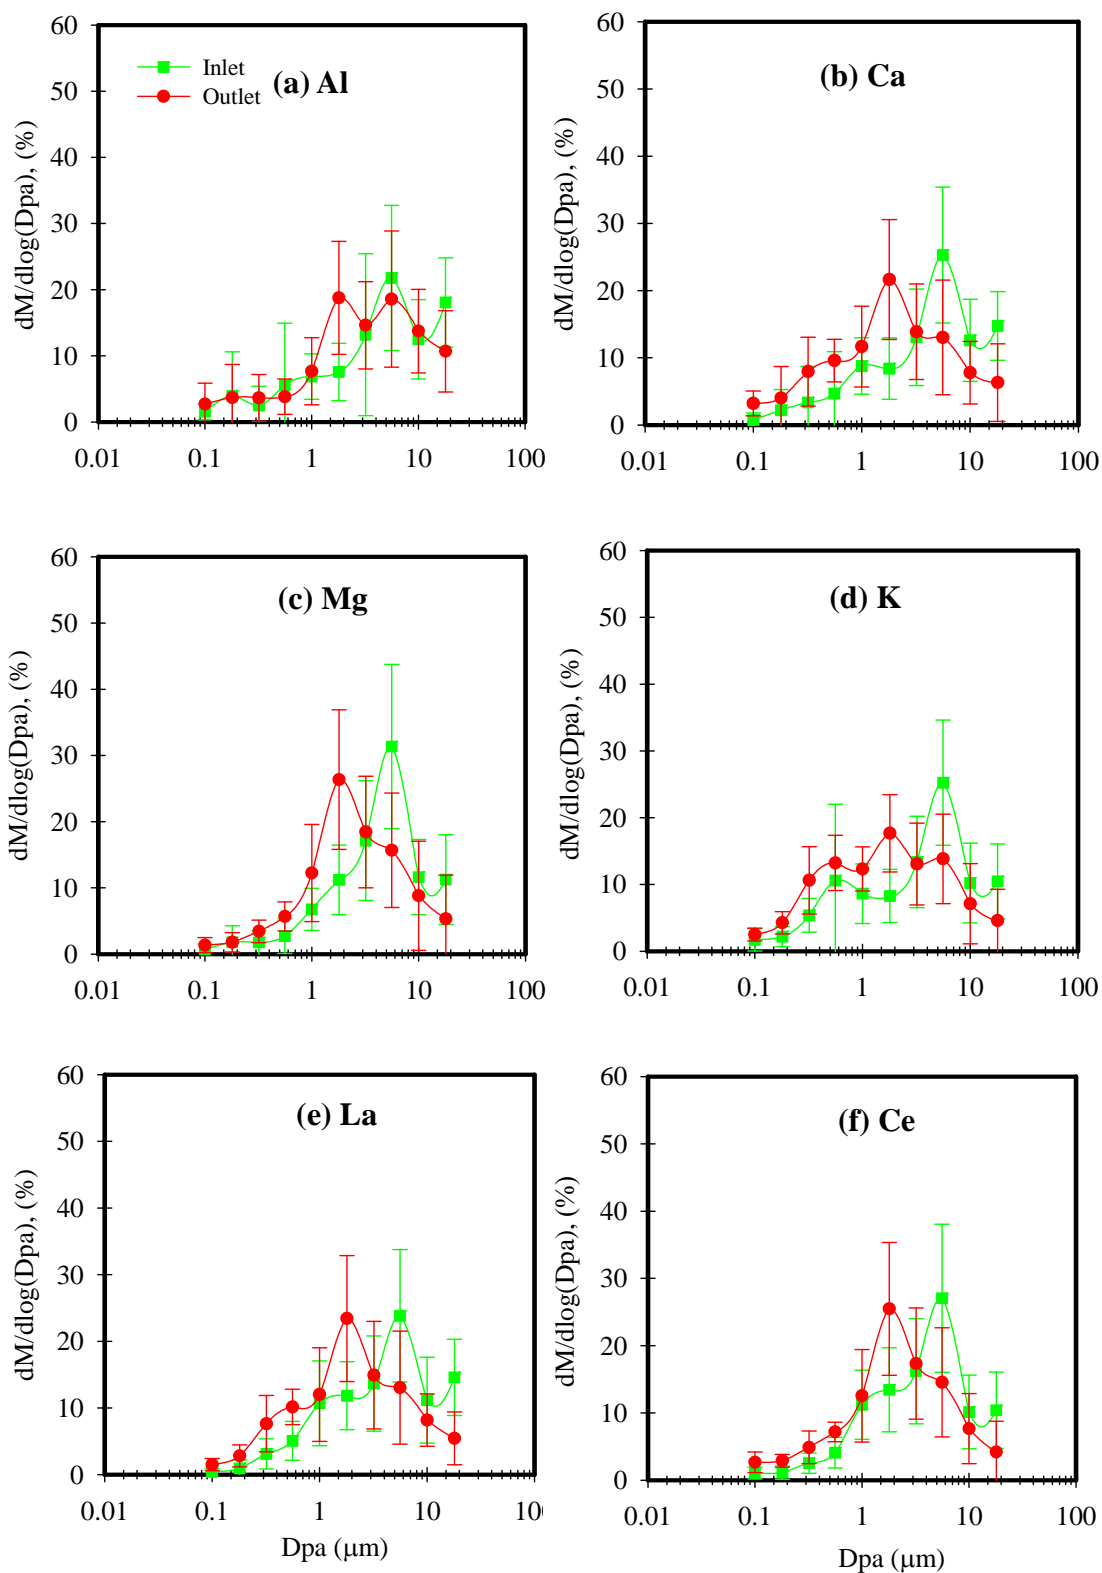

Figure S1. Average size distributions of Al, Ca, Mg, K as well as La and Ce observed at the inlet and outlet sites inside Hsuehshan Tunnel.

## Inlet site

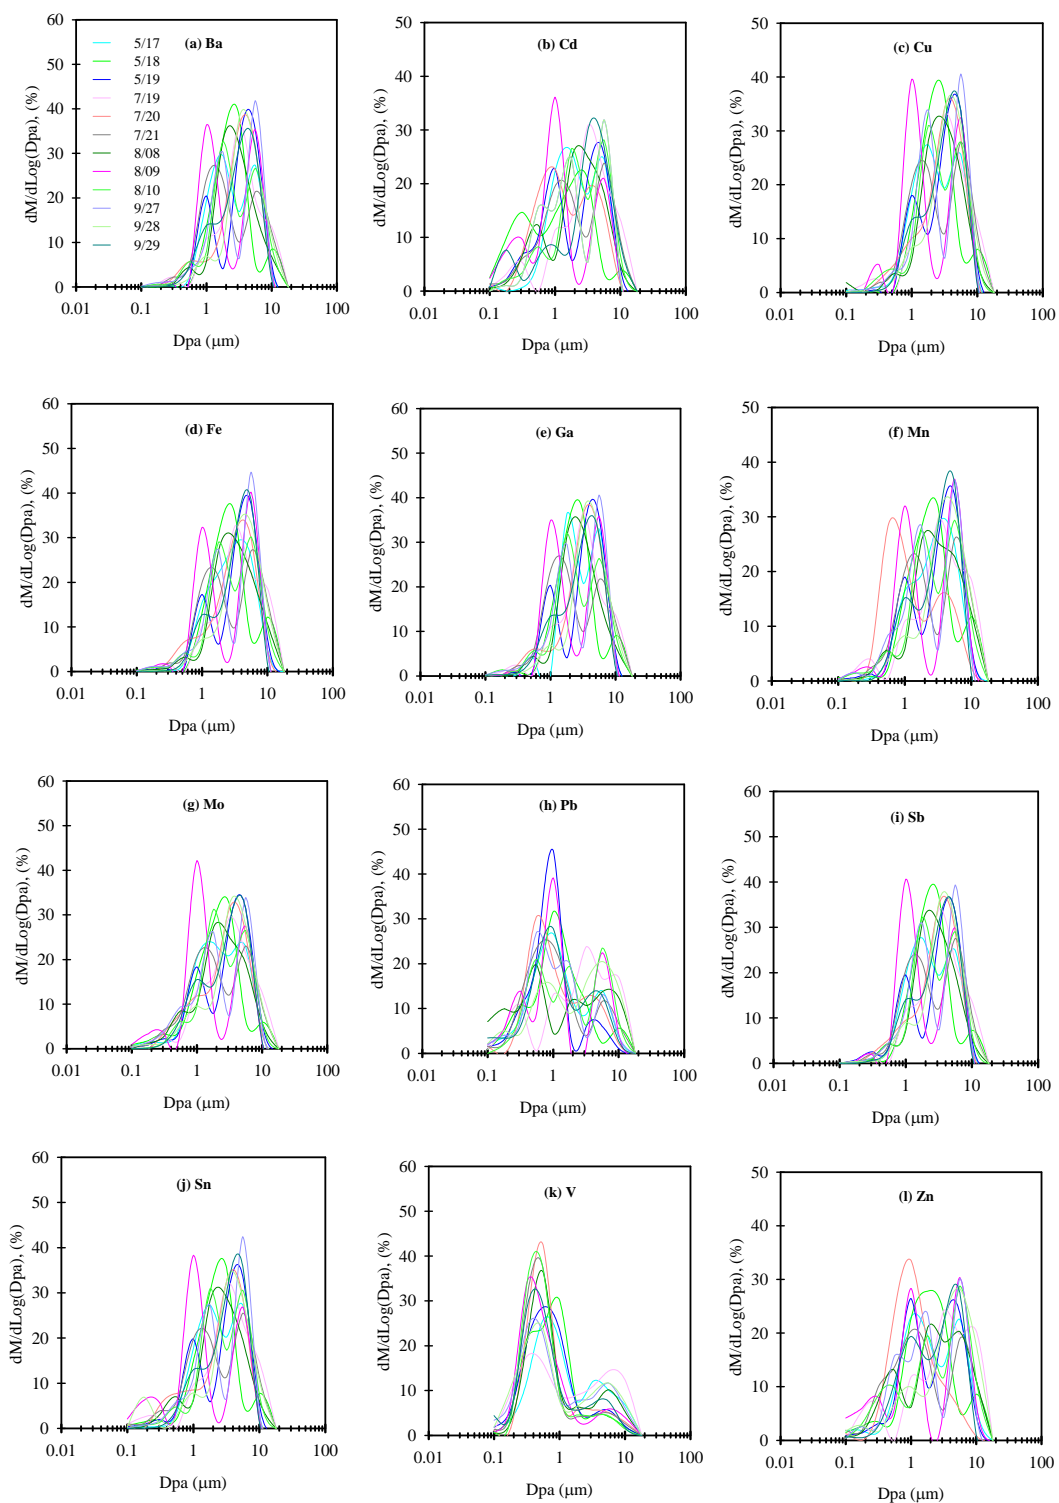

Figure S2. Size distributions of traffic-derived elements in all sets of size-resolved samples collected at both the inlet and outlet sites in Hsuehshan Tunnel.

## Outlet site

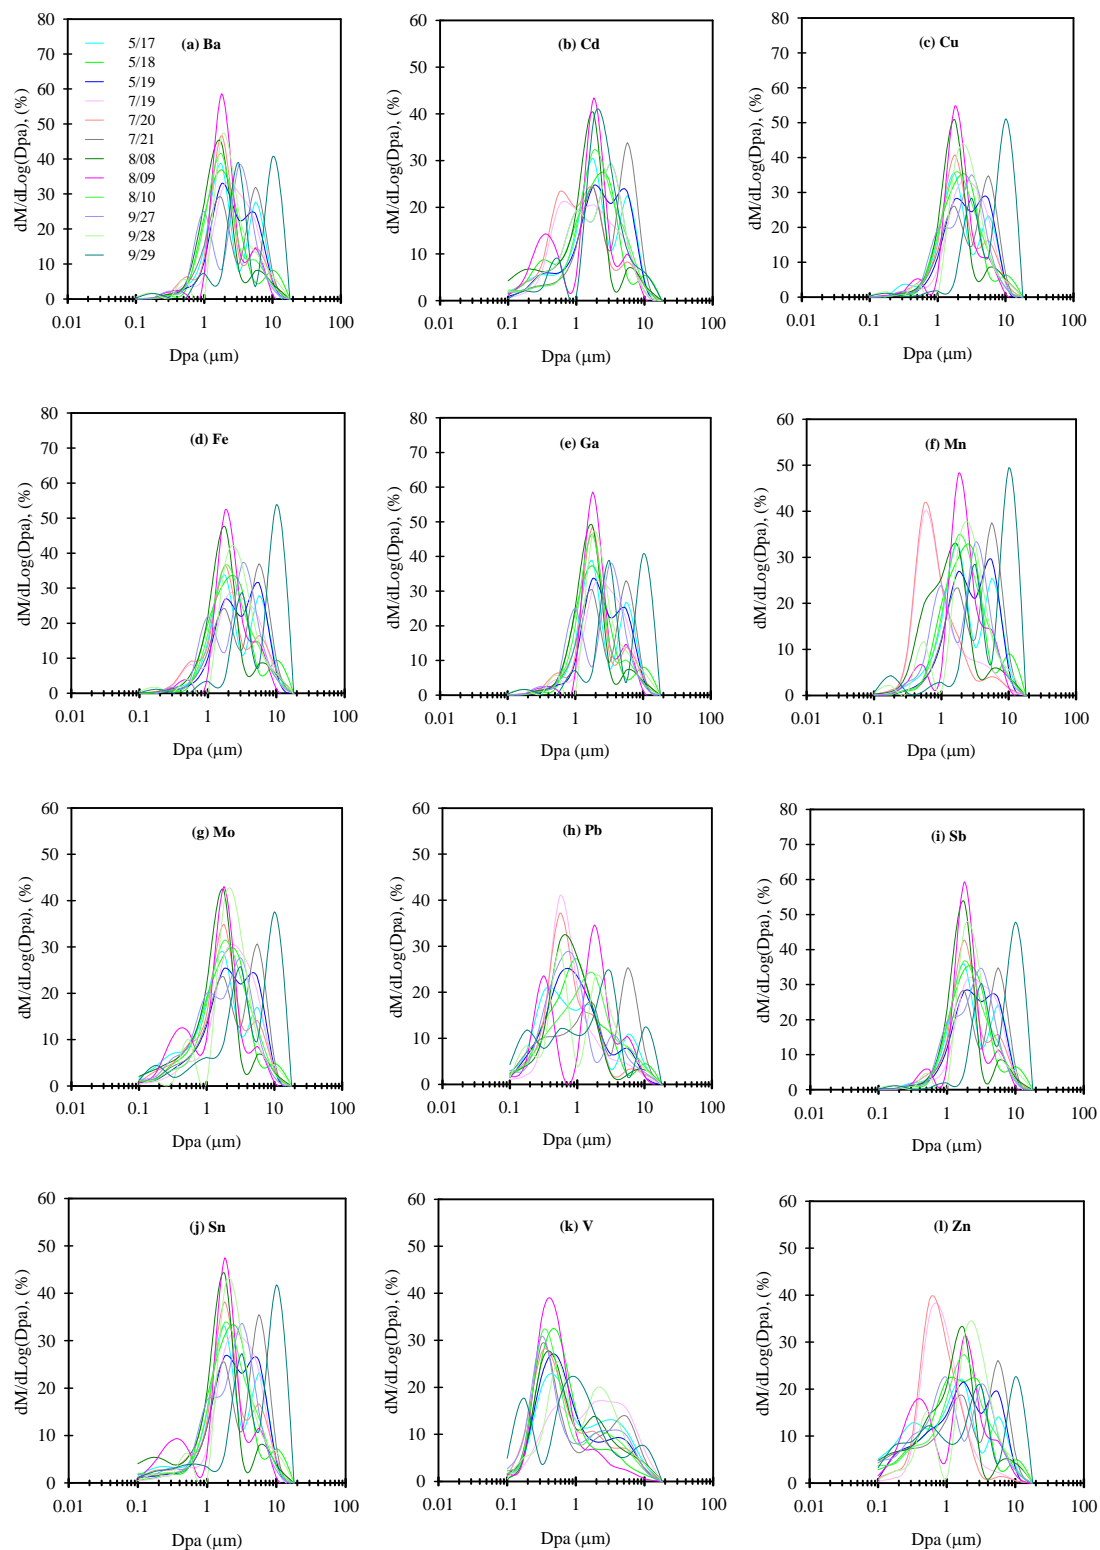

Figure S2 (continued)



## Inlet site

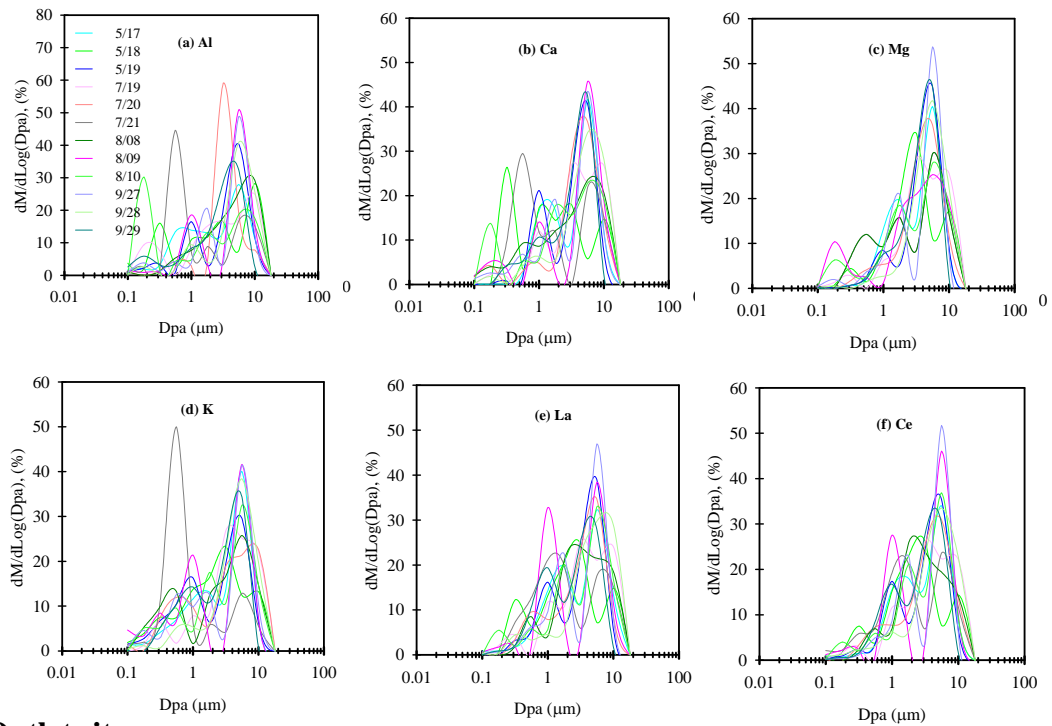

## Outlet site

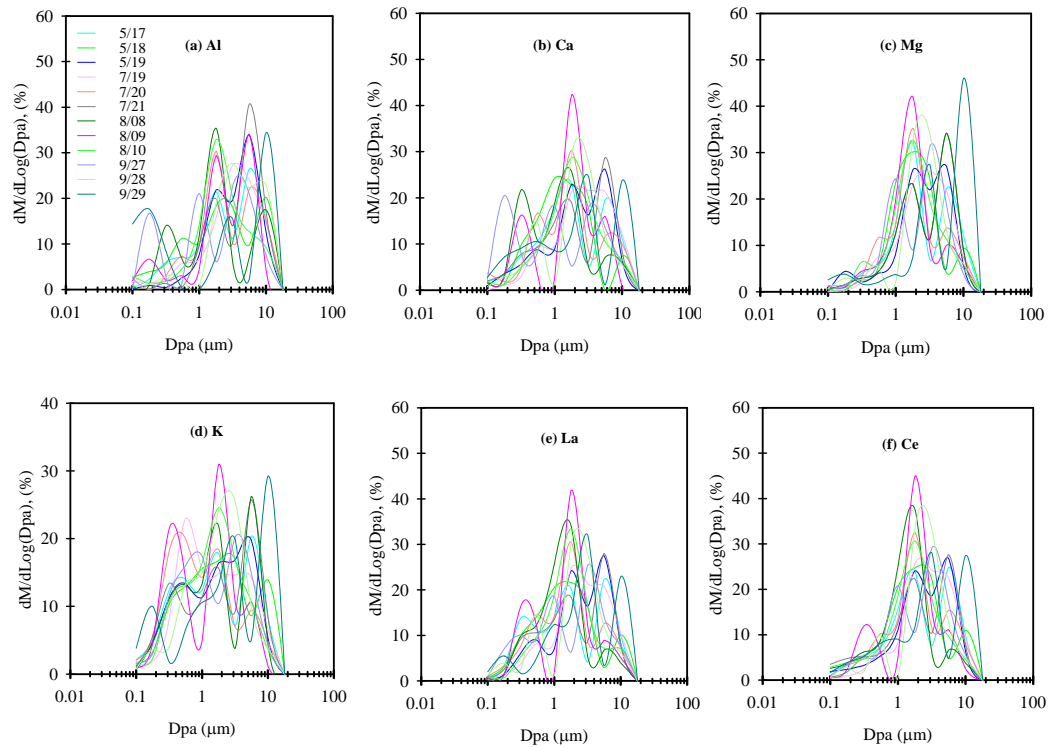

Figure S3 Size distributions of major crustal elements (Al, Ca, Mg and K) and rare earth elements (La and Ce) of all size-resolved samples collected in Hsuehshan

Tunnel.

## References

- Grieshop, A. P., Lipsky, E. M., Pekney, N. J., Takahama, S., and Robinson, A. L.: Fine particle emission factors from vehicle in a highway tunnel: effects of fleet composition and season, *Atmos. Environ.*, 40, 287-298, doi:10.1016/j.atmosenv.2006.03.064, 2006.
- Hee, K. W., and Filip, P.: Performance ceramic enhanced phenolic matrix brake linings materials for automotive brake linings, *Wear*, 29, 1088-1096, doi:10.1016/j.wear.2005.02.083, 2005.
- Ho, K. F., Lee, S. C., Chow, J. C., and Watson, J. G.: Characterization of PM10 and PM2.5 source profiles for fugitive dust in Hong Kong. *Atmos. Environ.*, 37, 1023-1032, doi:10.1016/S1352-2310(02)01028-2, 2003.
- Huang, X., Olmez, I., Aras, N. K., and Gordon, G. E.: Emissions of trace elements from motor vehicles: potential marker elements and source composition profile, *Atmos. Environ.*, 28, 1385-1391, doi:10.1016/1352-2310(94)90201-1, 1994.
- Iijima, A., Sato, K., Yano, K., Tago, H., Kato, M., Kimura, H., and Furuta, N.: Particle size and composition distribution analysis of automotive brake abrasion dusts for the evaluation of antimony sources of airborne particulate matter. *Atmos. Environ.*, 41, 4908-4919, doi:10.1016/j.atmosenv.2007.02.005, 2007.
- Kulkarni, P., Chellam, S., and Fraser, M. P.: Lanthanum and lanthanides in atmospheric fine particles and their apportionment to refinery and petrochemical operations in Houston, TX, *Atmos. Environ.*, 40, 508-520, doi:10.1016/j.atmosenv.2005.09.063, 2006.
- Kuo, C.-Y., Wang, J.-Y., Chang, S.-H., and Chen, M.-C.: Study of metal concentrations in the environment near diesel transport routes, *Atmos. Environ.*, 43, 3070-3076, doi:10.1016/j.atmosenv.2009.03.028, 2009,

- Lin, C.-C., Chen, S.-J., Huang, K.-L., Hwang, W.-I., Chang-Chien, G. P., and Lin, W. Y.: Characteristics of metals in nano/ultrafine/fine/coarse particles collected beside a heavily trafficked road, *Environ. Sci. Technol.*, 39, 8113-8125, doi: 10.1021/es048182a, 2005.
- Lough, G. C., Schauer, J. J., Park, J.-S., Shafer, M. M., Deminter, J. T., and Weinstein, J. P.: Emissions of metal associated with motor vehicle roadways, *Environ., Sci. Technol.*, 39, 826-836, doi:10.1021/es048715f, 2005.
- Shafer, M. M., Toner, B. M., Overdier, J. T., Schauer, J. J., Fakra, S. C., Hu, S., Herner, J. D., and Ayala, A.: Chemical speciation of vanadium in particulate matter emitted from diesel vehicles and urban atmospheric aerosols, *Environ. Sci. Technol.*, 46, 189-195, doi:10.1021/es200463c, 2012.
- Thorp, A., and Harrison, R. M.: Sources and properties of non-exhaust particulate matter from road traffic: a review, *Sci. Total Environ.*, 400, 270-282, doi:10.1016/j.scitotenc.2008.06.007, 2008.
- Wang, Y.-F., Huang, K.-L., Li, C.-T., Mi, H.-H., Luo, J.-H., and Tsai, P.-J.: Emissions of fuel metals content from a diesel vehicle engine, *Atmos. Environ.*, 33, 4637-4643, doi:10.1016/j.atmosenv.2003.07.007, 2003.
- Wählén, P., Berkowicz, R., and Palmgren F.: Characterization of traffic-generated particulate matter in Copenhagen, *Atmos. Environ.*, 40, 2151-2159, doi:10.1016/j.atmosenv.2005.11.049, 2006.
- Zhang, Q., Shen, Z., Cao, J., Ho, K., Zhang, R., Bie, Z., Chang, H., and Liu, S.: Chemical profiles of urban fugitive dust over Xi'an in the south margin of the Loess Plateau, China. *Atmos. Pollut. Res.* 5, 421-430, doi:10.5094/apr.2014.049, 2014.
